# Supplementary material for: Noninvasive assessment of dofetilide plasma concentration using a deep learning (neural network) analysis of the surface electrocardiogram: A proof of concept study
Source: PubMed Central journal article supplement (PMC6104915; doi:10.1371/journal.pone.0201059), 2018-08-22

S1 Fig

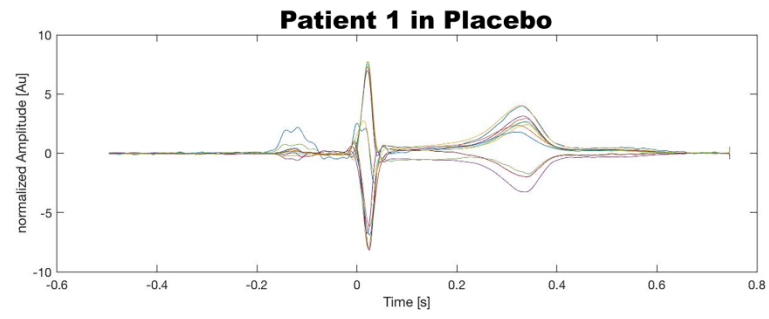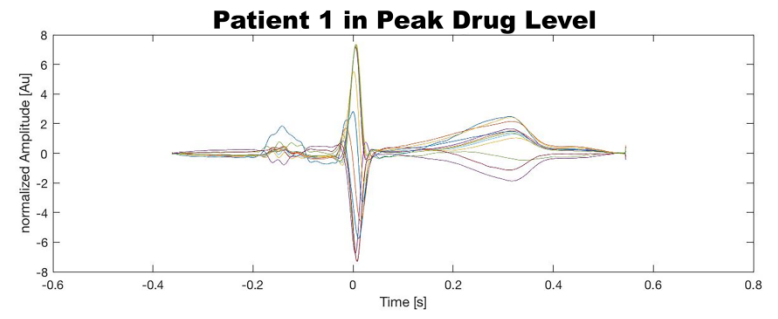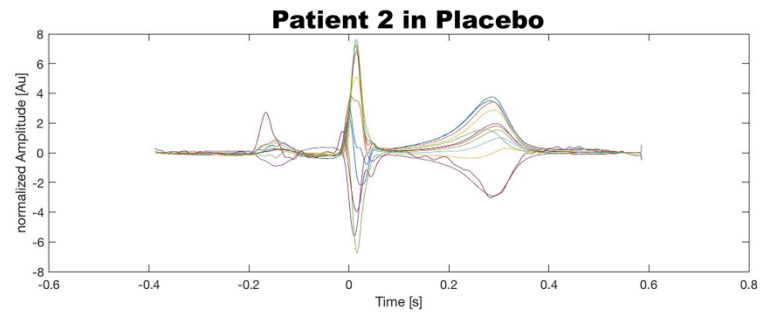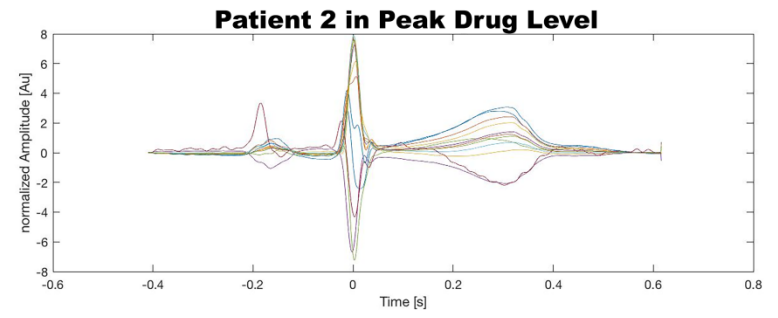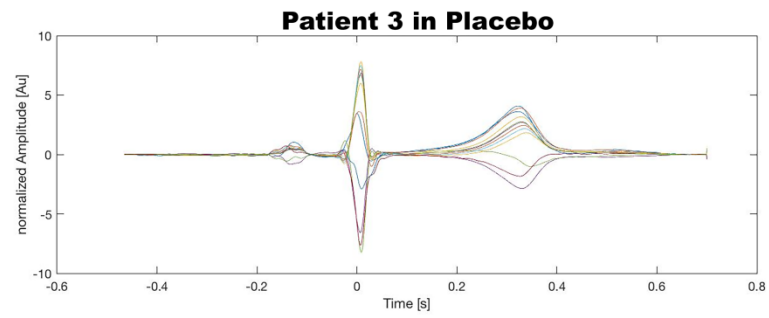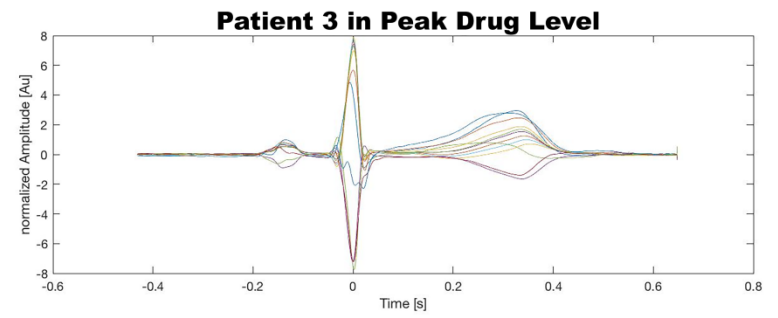

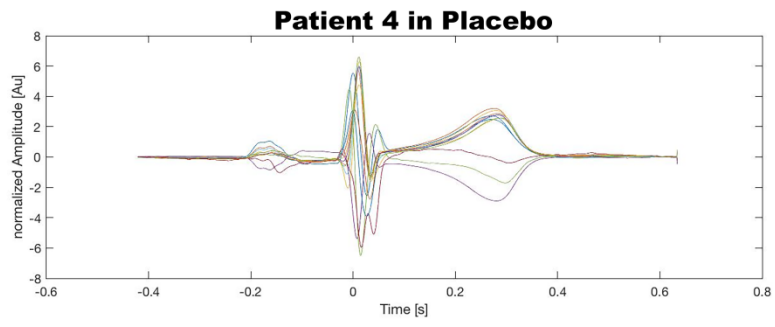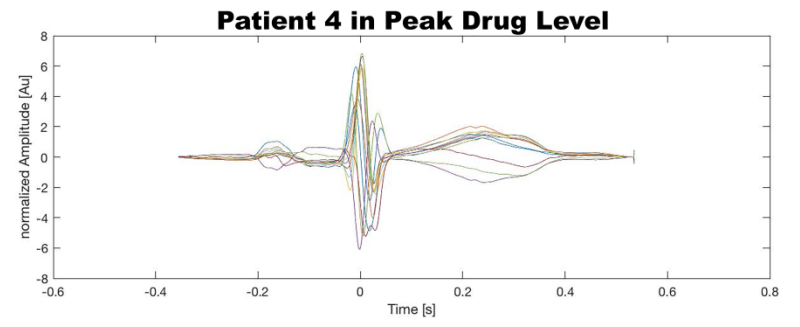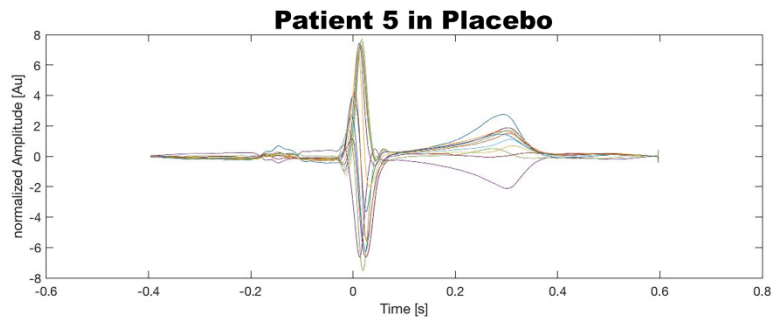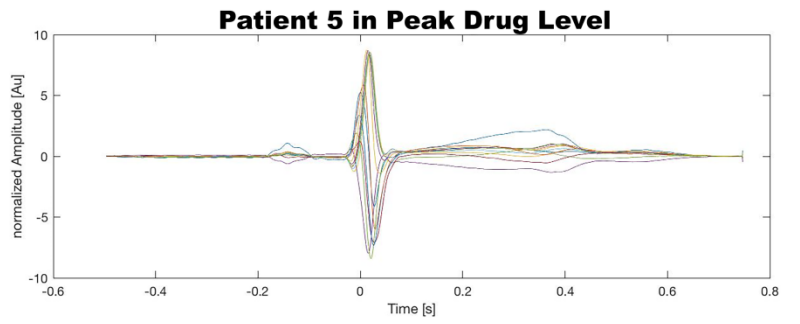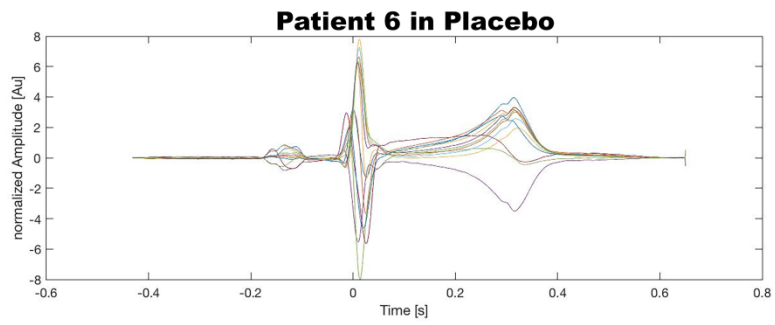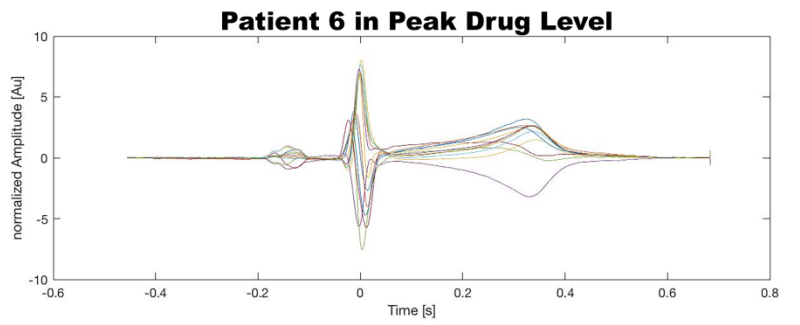

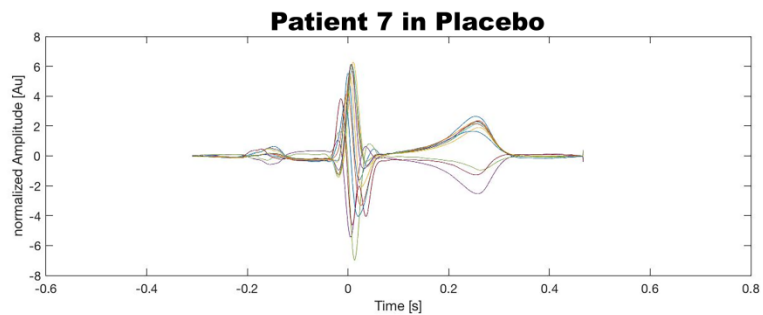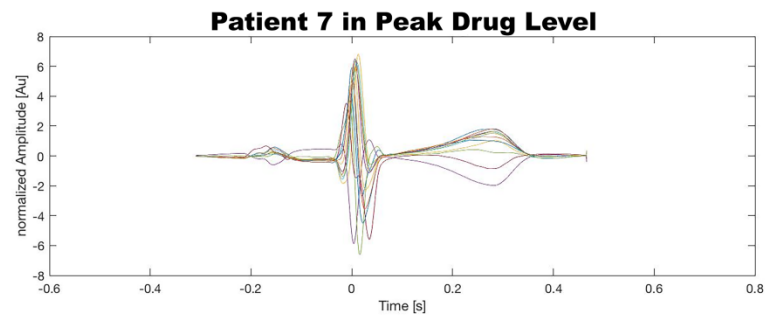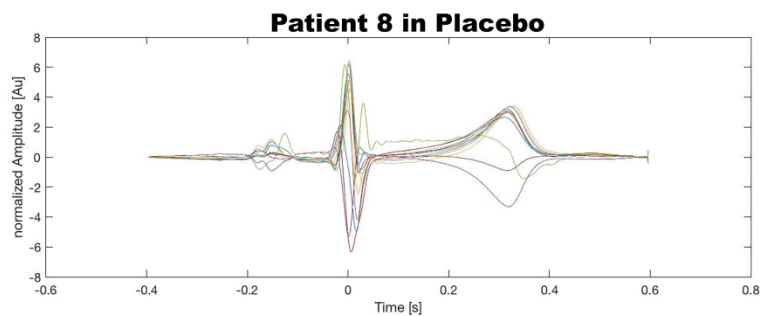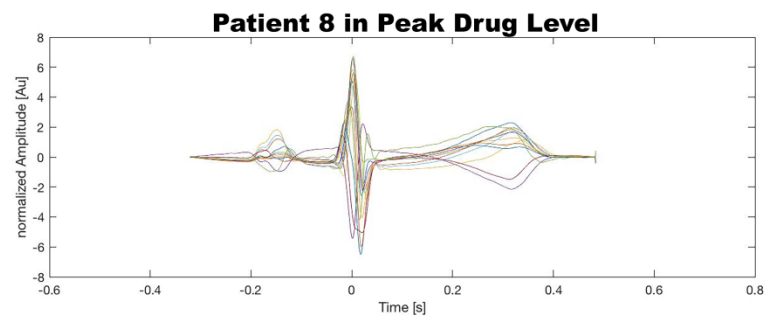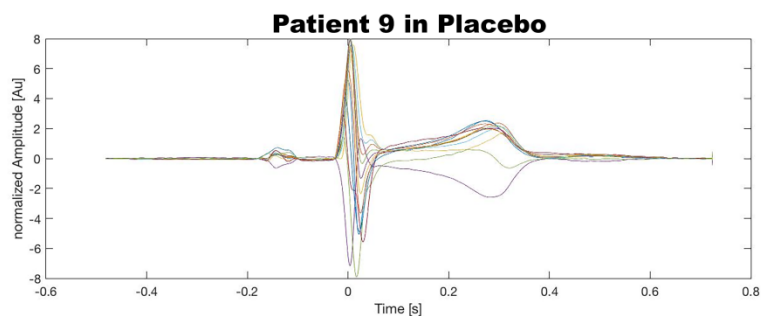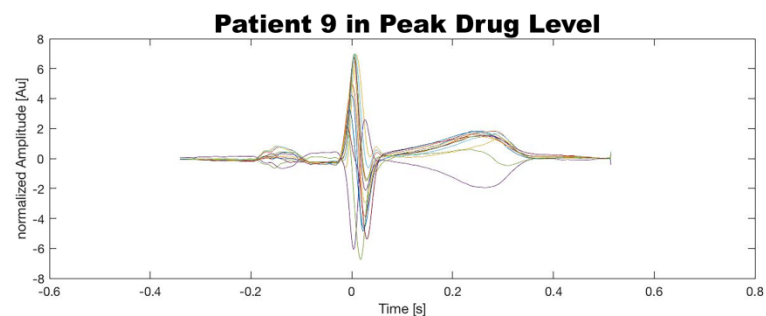

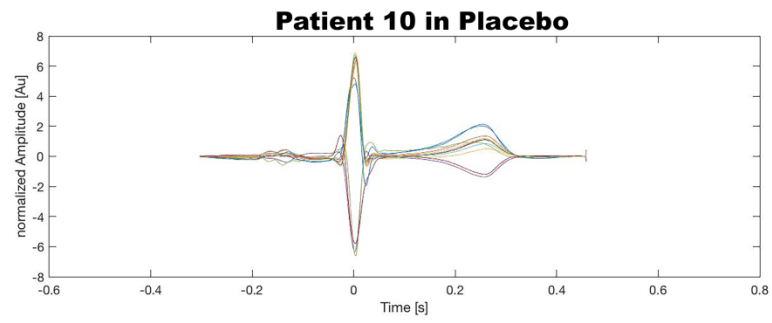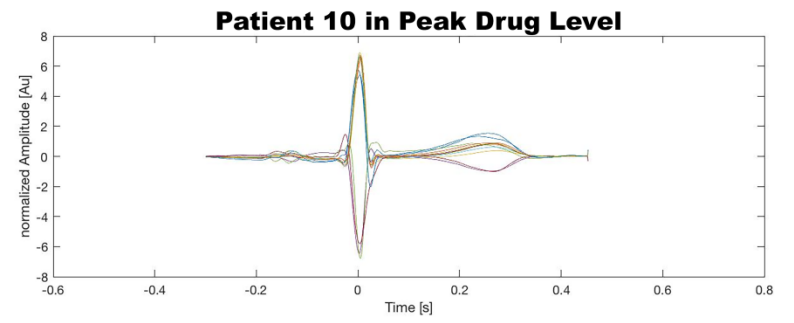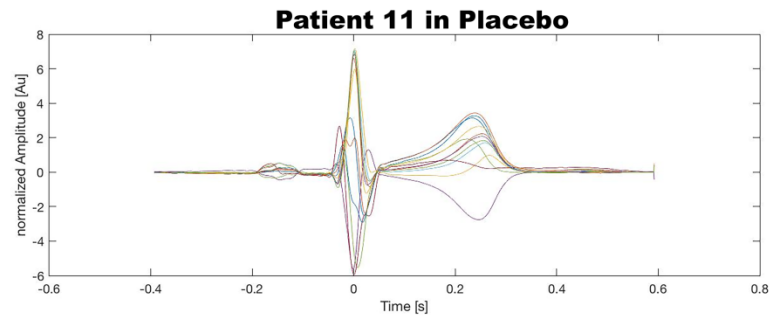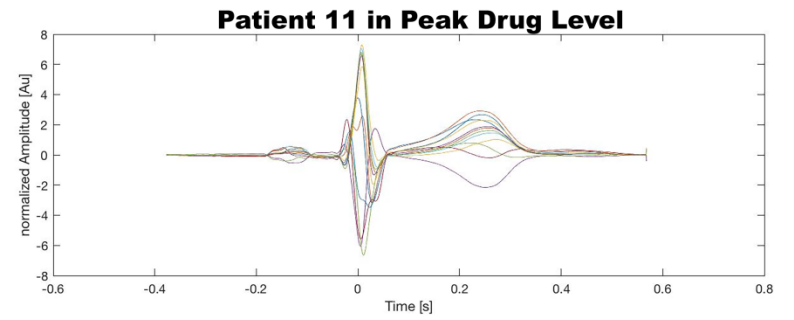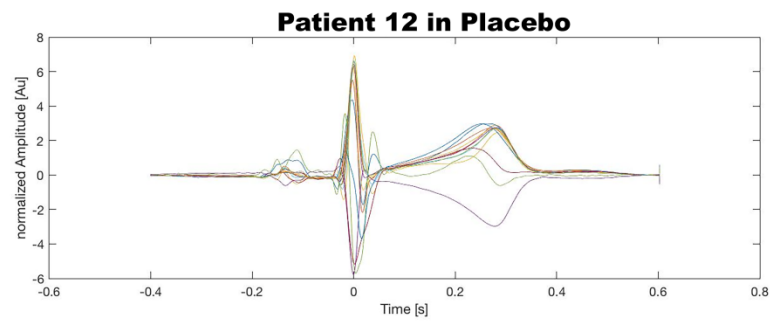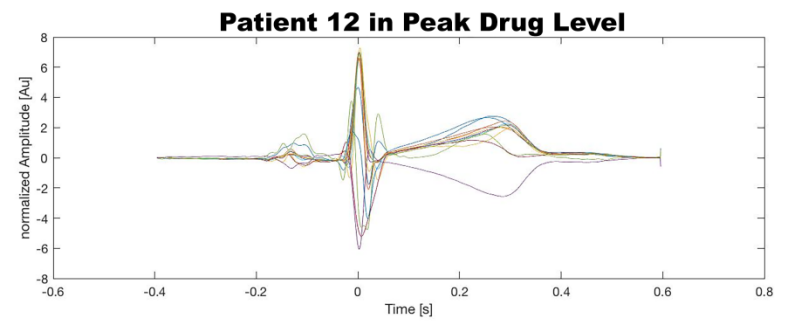

Supplement: pone.0201059.s001.pdf [file pone.0201059.s001.pdf]
